# Supplementary material for: The AaDREB1 Transcription Factor from the Cold-Tolerant Plant Adonis amurensis Enhances Abiotic Stress Tolerance in Transgenic Plant
Source: PubMed Central journal article supplement (PMC4849061; doi:10.3390/ijms17040611), 2016-04-22
Supplement: ijms-17-00611-s001.pdf [file ijms-17-00611-s001.pdf]

# Supplementary Materials: The *AaDREB1* Transcription Factor from the Cold-Tolerant Plant *Adonis amurensis* Enhances Abiotic Stress Tolerance in Transgenic Plant

Jun-Mei Zong, Xiao-Wei Li, Yuan-Hang Zhou, Fa-Wei Wang, Nan Wang, Yuan-Yuan Dong, Yan-Xi Yuan, Huan Chen, Xiu-Ming Liu, Na Yao and Hai-Yan Li

**Supplemental File 1.** The DREB proteins of plants used for phylogenetic analysis in Figure 1.

>AaDREB1gi|324983867|gb|ADY68770.1| DREB1/CBF transcription factor [Adonis amurensis]

MDYSQYGYPPSSPIYSSSSSSQGDITASQASHKRKSGRKKFTETRHPYIRGVRQRNGAKWVSEIRDRSKKN  
SSIWLGTFPTPGMAARAYDVAALALRGSAPLNFVDSAWLLPRPKSSSAQDIKLAASEAAQAFAPTATSS  
SSSSSPMNLRVPEPSSMFWDEEAMFNMPSSLDNMAEGMLLTPPSMQERFSCEDVDFNMELSLWND

>ShCBF3 gi|171191051|gb|ACB45086.1| [Solanum habrochaites]

MFYSDPRIESSSSDSIRANHSDEEVILASNNPKKPAGRKKFRETRHPVYRGRKRNSGKWWCEVREPNNK  
TRIWLGTFPTAEMAARAHVAAIALRGRSACLNFADSAWRLPTPASSDTKDIQAAAAEAESFRPLKSEE  
EESVVKDQSTTPDDMFFMDEEALFCMPGLLNTMAEGLMVPVPPQCTEMGDLVEADDMPPLWSYSI

>RcDREB1B gi|255575393|ref|XP\_002528599.1| [Ricinus communis]

MEFKQDPSPIPSSSTNSHQNNHPNPHSPSMATKKRKAQRKKFQETRHPVYNGVRRRNGKWWSELRQPYNNK  
SRIWLGTFPSPDMAARAYDVAAFALRGDSASLNFPEVHLLPQARSTSIKDIQYAAEAADQSVSGGGG  
GSDVDHLFQCSSSSLSFCSSTIEGSDNVGKDWKNMNMFLDEEELFNMPALLDSMAEGLILTPPAMKKG  
FNWNNVEDDPVDLFFWTD

>AtCBF1 gi|18416562|ref|NP\_567721.1| [Arabidopsis thaliana]

MNSFSAFSEMFGSDYEPQGGDYCPTLATSCPCKPAGRKKFRETRHPYIRGVRQRNSGKWWSEVREPNNKT  
RIWLGTFQTAEMAARAHVAAALALRGRSACLNFADSAWRLRIPESTCAKDIQAAAAEAALAFQDETCDTT  
TTNHGLDMEETMVEAIYTPSEQEGAFYMDEETMFGMPTLLDNMAEGMLLPPPSVQWNHNYDGEGDGDVSL  
WSY

>IcCBF1 gi|71983373|gb|AAZ57434.1| [Iris lactea var. chinensis]

MNSFSAFSEMGLSDYEPQGGDYCPTLATSCPCKPAGRKKFRETRHPYIRGVRQRNSGKWWSEVREPNNKT  
RIWLGTFQTAEMAARAHVAAALALRGRSACLNFADSAWRLRIPESTCAKDIQAAAAEAALAFQDETCDTT  
TTNHGLDMQETMVEAIYTPSEQEGAFYMDEETMFGMPTLLDNMAEGMLLPPPSVQWNHNYDGEGDGEVPL  
WSY

>ScCBF2 gi|171191061|gb|ACB45094.1| [Solanum commersonii]

MFPSYYSEPLAQLSSSSSIDNSNHYSNNFSDDEEVINLASNNPKKPAGRKKFRETRHPVFRGIRMRNS  
GKWWCEVREPNNKSRIWLGTFPTAEMAARAHVAAALALRGRSACLNFADSVWRLPIPASSNSKDIQAAAA  
EAAEIFRPSSLEEESEEVSGECSNTTTPETPEKALSMNEEAQVNSFFMDEEALFYMPGLIANMAEGLMLP

LPQCLEIGDYVEADHAYISLWNYSI

>AtCBF2 gi|157273079|gb|ABV27118.1| [Arabidopsis thaliana]  
MNSCSAFSEMFSGDYESPVSSGGDYSPKLATSCPCKPAGRKKFRETRHPIYRGVQRNSGKWVCELREP  
KKTRIWLGTFTAEMAARAHVAAIALRGRSACLNFADSAWRLRIPESTCAKEIQKAAAEASNFQDEMC  
HMTTDAHGLDMEETLVEAIYTPESQDAFYMDEEAMLGMSLLDNMAEGMLLPSPSVQWNYNFDVEGDDD  
VSLWSY

>CbCBF gi|98980426|gb|AAY21899.2| [Chorispora bungeana]  
MNSFSAFSEMFSGDYESPVSSGGDYSPKLATSCPCKPAGRKKFRETRHPIYRGVQRNSGKWVCELREP  
KKTRIWLGTFTAEMAARAHVAAIALRDRSACLNFADSAWRLRIPESTCAKEIQKAAAEALNFQDEMC  
HMTTDAHGLDMEETLVEAIYTPESQDAFYMDEEAMLGMSLLDNMAEGMLLPSPSVQWNYNFDVKGDDD  
MSLWSY

>ScCBF3 gi|171191059|gb|ACB45092.1| [Solanum commersonii]  
MDIFRSYSDPQLESSSSFSDDTTYNPNRANHSDEEVILASNNPKPAGRKKFRETRHPVYRGVRRNS  
GKWVCEVREPNNKTRIWLGTFTAEMAARAHVAAIALRGRSACLNFADSAWRLPTPASSDTKDIKAAA  
EAAKSFRLKSEESVVTGDTSTPDDMFFMDEEALFCMPGLLTNMAEGLMVPVPPQCTEMGDHVEADDM  
PLWSYSI

>AaDREB1A gi|294335527|gb|ADE62311.1| [Ageratina adenophora]  
MATLIQFNTPYTSLADNIPTTESSSTSDYSTGTSFSDEEVLASKNPKRAGRKKFRETRHPVYRGVRR  
RDSGKWVCEVREPNNKTRVWLGTYPTADMAARAHVAAALMRGRSACLNFADSLWRLPIPESSNVKDIQK  
AAVKAAEAFRPTETDVAVIEESNELTGNVFCVDDSEIFEMQGLADMAEGMMLPPPRTIEYDNCQDDLEF  
FVDASLWSF

>AaCBF gi|125950487|gb|ABN58746.1| [Ageratina adenophora]  
MATLIPFNTPYTSLADNIPTTESSSTSDYSTGTSFSDEEVLASKNPKRAGRKKFRETRHPVYRGVRR  
RDSGKWVCEVREPNNKTRVWLGTYPTADMAARAHVAAALMRGRSACLNFADSLWRLPIPESSNVKDIQK  
AAVKAAEAFRPTETDVAVIEESNELTGNVFCVDDSEIFEMQGLADMAEGMMLPPPRTIEYDNCQDDLEF  
FVDASLWSF

>PpDREB gi|148927433|gb|ABR19831.1| [Prunus persica]  
MDMFSQALSDSPDQPESSSFSDASVTTLPASSDENVILASSRPPKRRAGRRVFKETRHPVYRGVRRNN  
KWVCELREPNNKSRIWLGTFTAEMAARAHVAAALAFRGKLACINFADSAWRLPLPASMDTMDIRRAAA  
EAAEGFRPAEFGGLSSGSSDEKEMNLSVDMKNSLCLFYLDDEEMFDMPLIDNMAQGLLLSPPQCSAG  
YLNWDDVETEADAKLWSFSI

>RcDREB1A gi|255537271|ref|XP\_002509702.1| [Ricinus communis]  
MDHHIFSQSDPFPFNSNSITRDSPTLSDACSAPGGSSHSDEEVILASNLPPKAGRRVFKETRHPVFRG  
VRRRNGNKWVCEVRPNKKSRIWLGTYPTEMAARAHVAAALALRGKSACLNFSADSAWRLPIPSSTARE  
IRRIAAEAESFRPQEFGCPGEQNSSTEDHPSGACCEDESKTTPFMDAEEVFDMPSSLVEMAQGLLLSPL  
RFEEVDVGTDWNGLENDFDISLWSD

>AtCBF4 gi|15242244|ref|NP\_200012.1| [Arabidopsis thaliana]

MNPFYSTFPDSFLSISDHRSVPVSDSSECSPLASSCPKRRAGRKKFRETRHPYIRGVRQRNSGKWVCEVR  
EPNKKSRILWLTGTFPTVEMAARAHVAALALRGRSACLNFAWSAWRLRIPETTCPKEIQKAASEAAMAFQN  
ETTTEGSKTAAEAEAAEGVREGERRAEQNGGVFYMDDEALLGMPNFFENMAEGMLLPPPEVGNHND  
FDGVGDVSLWSFDE

>EgCBF1D gi|193161381|gb|ACF15447.1| [Eucalyptus gunnii]  
MAAPGNFPDEEVRASHHPKRRAGRKKFRETRHPVYRGVRLRDSGKWVCEVREPRKKSRIWLTGTFPTVEM  
AARAHVAALALRGRSACLNFAWSAWRLPVPASADTKDIQKAAAKAAVAFQPVSESESDVMSGDEKKSPS  
EEGMLFDDDEDVFGMPGLLTNMAEGMLLPPPCGGDGYGGEDDGNLDAYVSLWSYSL

>BpCBF2 gi|145952336|gb|ABP98988.1| [Betula pendula]  
MDVFSQYSWESESAMHLSDEEIQLASRNPKKRAGRTKFKETRHPVYRGVRRRNSGKWVCEVREPKNQSR  
IWLGTFTPTAEMAARAHVAALALRGRSACLNFAWSAWRLPLPASGTAKDIQRTAVEAAEAFRPTETKAVE  
ERQPSEGVFFMDEEAVFGMPGLLVNMAEGMLLPPPYCVGDDDVYGGDDVEAHADVSLWSYSI

>LhCBF3 gi|171191040|gb|ACB45078.1| [Solanum habrochaites]  
MFYSDPRIESSSDSFRANHSDEEVLASNNPKKAPGRKKFRETRHPVYRGVRRRNSGKWVCEVREPKNK  
SRIWLTGTFPTAEMAARAHVAALALRGRSACLNFAWSAWRLPTPASSDTKDIQKAAAEAAESFRPLKSEE  
EESVVKDQSTTPDDMFFMDEEALFCMPGLLTNMAEGLMVPVPPQCTEMGDHVEADDMPVLSYSI

>VrCBF1B gi|39578540|gb|AAR28672.1| [Vitis riparia]  
MDSDEEFSASSSSSSRTSSNPSDSLPLQCIQGHKRKAGRKKFRETRHPYIRGVRQRNGNKWVCEVREP  
LKKSRILWLTGTFPTPEMAARAHVAALALRGRFASLNFAWSAWRLPRPKSSSAEDIQVAALEATKAFNPTA  
PSSSSLASALDNMSGVADSKKVLTPSPNVESPKLKSQRMVLEVSPVDTKRSEKVGDGSTPVMDEEAMFN  
MQGLINSMAEGLLLTPPAMCKGFSWDDATDSDHIDLWDD

>VaCBF1 gi|156186801|gb|ABU55657.1| [Vitis aestivalis]  
HEEFSASSSSSSRTSDSNPSDSLPLQCIQGHKRKAGRKKFRETRHPYIRGVRQRNGNKWVCEVREPLKKS  
RIWLTGTFPTPEMAARAHVAALALRGRFASLNFAWSAWRLPRPKSSSAEDIQVAALEATKAFNPTAPSS  
SLASALDNMSGVADSKKVLTPSPNVESPKLKSQRMVLEVSPVDTKRSEKVGDGSTPVMDEEAMFNMQGL

>VrCBF1A gi|39578538|gb|AAR28671.1| [Vitis riparia]  
MDSDEEFSASSSSSSRTNSNPSDSLPLQCIQGHKRKAGRKKFRETRHPYIRGVRQRNGNKWVCEVREP  
LKKSRILWLTGTFPTPEMAARAHVAALALRGRFASLNFAWSAWRLPRPKSSSAEDIQVAALEATKAFNPTA  
PSSSSLASALDNMSGVADSKKVLTPSPNVESPKLKSQRMVLEVSPVDTKRSEKVGDGSTPVMDEEAMFN  
MQGLINSMAEGLLLTPPAMCKGFSWDDATDSDHIDLWDD

>VvCBF1 gi|39578542|gb|AAR28673.1| [Vitis vinifera]  
MDSDEEFSASSSSSSRTNPSSDSLPLQCIQGHKRKAGRKKFRETRHPYIRGVRQRNGNKWVCEVREP  
LKKSRILWLTGTFPTPKMAARAHVAALALRGRFASLNFAWSAWRLPRPKSSSAEDIQVAALEATKAFNPTA  
PSSSSLASALDNMSGVADSKKVLTPSPNVESPKLKSQRMVLEVSPVDTKRSEKVGDGSTTVSMDEEAMFN  
MQGLINSMAEGLLLTPPAMCKGFSWDDATDSDHIDLWDD

>VvCBF3 gi|254952727|gb|ACT97164.1| [Vitis labrusca x Vitis vinifera]

MESERDQSSPSSSSSSSSQTKCSISSSPVHKRKRKAGRKKFRETRHPVYRGVQRNGNRWVCEVLDPKNKSRI  
WLGTFPAPEMAARAHDAALAFRQDFAALNFPDSASRLPRAKSSSARDIQVAALAAAMAFRPAAPSSSSSS  
HISHVTACSELETSCSEDSPQLSRKKVGVGTLEDESSQSAPHGSSTVFMDEEALFNMPGLINSMAEG  
LLLAPPTMLGGFSWDDTTSYTDLSLWDD

>RcCBF gi|255582828|ref|XP\_002532187.1| [*Ricinus communis*]  
MEKNDSSSTCKLSPCSPCSHISHQATLAPAKKRKAGRTKFKETRHPYIRGVRRRNGNKWVCEVREP NLKS  
RIWLGTYPTPEMAARAHDAALAFRGEFASLNLYLDSAWILPRPKSSSHEDIKRAALEAAEAFKPSSTDLS  
STSPSSSSSSASSKPSHEDDLRFLMDTQDENEKVLNNGNSSMNIEPCPNVSIERNECSVTSFLD  
DEALFNMPVLLDSMAEGLILTPPSIRRGFNWDDMAFAVDLTLWRD

>VrCBF2 gi|39578544|gb|AAR28674.1| [*Vitis riparia*]  
MDLDRESSASSTSPSRANLVSSDPRCPSRCIPHKRKTGRKKFRKTRHPYIRGVRQRNENKWWSEVREPS  
KKSRIWLGTFPTPEMAARAHDAALALRGHFASLNFPDSAWRLPRARSSSAGDVQFAAIQAAKAFQQPPS  
SSSSTPFVMDNMSAGSRKILETSSVVDTPQLKSQKQVGVSSMDSKSWEKAGDGFPTAFVDEEAVFNMPG  
LIDSMAEGLLLTPPAMCEGFSWDDAVSHIDLWHDHFLS

>PtCBF6 gi|134038598|gb|AB048367.1| [*Populus trichocarpa*]  
MCLLCPTYVTSCFMKNKAGRKKFKETRHPVYRGVRRRNGNKWVCEVREP NLKSRIWVGTFKSPEMAARAH  
DVAALALKGELAAALNFLDSALILPRAKSSSARDIQRAALAAATEVLGRSASSCSSSSSPDHKKLSCVPNHS  
NATFFDEEALFNMPGLLDSMAEGLILTPPAMARGVYWDMACTDLTLWEDDYLDLSDQ

>ShCBF2 gi|171191053|gb|ACB45088.1| [*Solanum habrochaites*]  
MDIFESYYSNLLVSSLSSLSMSDTNNINHYPNEEILASNYPKKPAGRKKFRETRHPVYRGVRRKNS  
GKVVCEVREP NLKSRIWLGTFPTPEMAARAHDAALALRGRSACLNFADSAWRLPIPASSNSKDIQKAAA  
EAAEIFRPLKESEEVSGESPETSENVQESSYFVDEEALFFMPGLLANMAEGLMLPPPQCLEIGDHYVELA  
DVHAYMPLWDYSI

>StCBF2B gi|171191066|gb|ACB45098.1| [*Solanum tuberosum*]  
MDIYSDPLAESSISDTNNHYPNFSDEEVINLASNNPKKPAGRKKFRETRHPVYRGVRRMRNSGKWWC  
EVREP NLKSRIWLGTFPTPEMAARAHDAALALRGRSACLNFADSAWRLPIPASSNSKDIQKAAAEEAE  
IFRPESEEVSGECSSSTTPETLENTFFMKEESSLFMDEEALFYMPGLIVNMAEGLMLPPPQCLEIGDHYV  
ELVDMHAYMPLWNYSI

>StCBF4 gi|171191046|gb|ACB45083.1| [*Solanum tuberosum*]  
MDQLNKNSLILASNNPKKPAGRKKFRETRHPVYRGVRRMRNSGKWWCEVREP NLKSRIWLGTFPTAEMAA  
RAHDVAALALRGRSACLNFADSAWRLPIPASSNSKDIQKAAAEEAEIFRPESEESERVASSEMHESSIFFMN  
DEGRESSFFMDEEALFDMPGLIANMAEGLMLPPPQCAEVEDHYMEADDAYMPLWNY

>LeCBF1 gi|18535580|gb|AAK57551.1| [*Solanum lycopersicum*]  
MNIFETYYSDSLILTESSSSSSSSSFSEEEVILASNNPKKPAGRKKFRETRHPYIRGIRKRNSGKWWCEV  
REP NLKTRIWLGTFPTAEMAAARAHDAALALRGRSACLNFSDSAWRLPIPASSNSKDIQKAAAQAVEIFR  
SEEVSGESPETSENVQESSDFVDEEALFFMPGLLANMAEGLMLPPPQCAEMGDHCVETDAYMITLWNYSI

>StCBF2A gi|171191065|gb|ACB45097.1| [*Solanum tuberosum*]

MFPSYYSEPLAELSPSSSSSSISDNSNHYYNNNFSDEEVINLASNNPKKPAGRKKFRETRHPVFRGIRM  
RNSGKWVCEVREPNNKKSRIWLGTFPTAEMAARAHDVAALALRGRSACLNFAADSVWRLPIPASSNSKDIQK  
AAAEAAEIFRPSESEEVSGECSNITTPETPEKALSMNEEAQVNSFFMDEEALFYMPGLIANMAEGLMLPL  
PQCLEIGDYVEADHAYISLWNYSI

>HbCBF1 gi|66269671|gb|AA43213.1| [Hevea brasiliensis]  
MDVFPQYSDSLPFATHSCSLHYPESSSTLSDTCSALRANLSDEEVLLASSYPKKRAGRKKFRETRHPIYRG  
VRRRNSGKWVCEIREPNKKSRIWLGTFPTAEMAARAHDVAALALRGRSACLNFAADSSWRLPVPASREAKD  
IRKAAAEAAAMAFQPEGTEGFSGELKQENKWTTESAPEDVFYMDDEAVFAMPGLLASMAEGLMLPPPQCV  
GSGGEDGEMDAADVLSWFSI

>StCBF3 gi|212525374|gb|ACJ26758.1| [Solanum tuberosum]  
MDIFRSYSDPQIESSSSFSDDTTYNPNRANHSDEEVILASNNPKKPAGRKKFRETRHPVYRGVVRMRN  
SGKWVCEVREPNNKTRIWLGTFPTAEMAARAHDVAALALRGRSACLNFAADSAWRLPTPASSDTKDIQAAA  
AEAAESFRPLKSEEEVVTGDQSSTPDDMFFMDEEALFCMPGLLTNMAEGLMVPPPQCTEMGDHVEADD  
MPLWSYSI

>PtDREB68 gi|224058611|ref|XP\_002299565.1| [Populus trichocarpa]  
MPNDRQEASSFSDDSSSTRVHSDDEEVLLATSFPKKRAGRRIIFRETRHPVFRGVKRNGNKWVCEMREP  
NKKKSRIWLGTYPTAEMAARAHDVAALALRGRSACLNFAADSAWRLPVPVSKDSKDI TRAAEAAELFRPQEF  
GGHPAKQQDSNAEAVFAMPGENDVFFEEAVFDMPGLLVDMAEGLLLSPPRYVRNDCNDLDHMENGSDLSL  
WSY

>RhDREB1B gi|209171188|gb|ACI42860.1| [Rosa hybrid cultivar]  
MDGGFSAFPQYDHTQYPPFGSDLPSSSHSDNNSGNGVGRMNSDEEVMLAATYPKKRAGRKKFKETRH  
PVYRGVRRRNSGKWVCEVREPNNKTRIWLGTFPTAEMAARAHDVAALSLRGRSACLNFAADSAWRLPVPAS  
TSAKDIQTAAQAAEAFRPTGEESEVSGSVTATEAELEPVFCMDEEDVFGMPGLLANMAEGLMLSPPHY  
NSYGGDDMEGYADVLSWYSI

>StCBF5 gi|171191045|gb|ACB45082.1| [Solanum tuberosum]  
MDQLNKSSILASNNPKKPAGRKKFRETRHPVYRGVVRMRNSGKWVCEVREPNNKKSRIWLGTYPTAEMAA  
RAHDVAALALRGGSAACLNFAADSAWRLPTPASSDTKDIQAAAEEAESFRPLKSEEEVSTGDQSSTPDN  
MFFMDEEALFCMPGLLTNMAEGLMVPPPQCTEMGDHVEADDMPLWSYSI

>PtCBF4 gi|145322756|gb|ABP64695.1| [Populus trichocarpa]  
MPNDRQEASSFSDDSSSTRVHSDDEEVLLATSFPKKRAGRRIIFRETRHPVFRGVKRNGNKWVCEMREP  
NKKKSRIWLGTYPTAEMAARAHDVAALALRGRSACLNFAADSAWRLPVPVSKDSKDI TRAAEAAELFRPQEF  
GENDVFFKEAVFAMPGENDVFFEEAVFDMPGLLVDMAEGLLLSPPRYVRNDCNDLDHMENGSDLSLWSY

>NtDREB4 gi|190333406|gb|ACE73696.1| [Nicotiana tabacum]  
MNIFGDHNFDPILPTLSTLLPAAESSTSSDSSGSSGSTPNYSDEEVMLASNYPKKRAGRKKFRETRHPVY  
RGIRRRNSNKWVCEVREPNNKKSRIWLGTFPTAEMAARAHDVAALALRGRSACLNFAADSAWRLPIPTSA  
AAKDIQKATVEAAETFRPVESHRENFKETIIVDQVIQELVAELPDNVLFMDEEALFCMPRLLVNMAEGLMLPP  
PQCIIDGYEMEADHADMSLWSYINSMAEGLLLTPAMCKGFSWDDATDSHIDLWLNDD

>PtDREB69 gi|224053977|ref|XP\_002298067.1| [Populus trichocarpa]  
MVMGGSNSFSPDKQESSLSLLSDSSGSQQDSPSSNEKVLLATSRPKKRAGRRIFKETRHPVYRGRVRRN  
GDKWVCELREPNNKSRIWLGTYPTPEMAARAHDAALAFRGKSACLNFAWSAWRLPVPISNEAKDIRRAA  
SEAAELFRSDLGQVMEDFRREDRGEVCSSTNDDIRDLPSENVGYIDEEAEFNMPGLLASMAEGLLLSP  
PHYTGDWNDGEIDADWSLWSS

>BpCBF1 gi|145952334|gb|ABP98987.1| [Betula pendula]  
MDVFSQYSSESSESGAMHLSDEEIRLASRNPKKRAGRKKFKETRHPVYRGRVRRRNSGKWVCEVREPNNKQSR  
IWLGTFTPEMAARAHDAALALRGRSACLNFAWSAWRLPVPASGTAKDIQRATAEAAEEFRPAESKAVE  
DRQPSESLFFMDEEAVFGMPGLMINMAEGMLLPPPYCVGDDDGYGDDVMEAHAEVSLWSYSI

>PtDREB67 gi|224131624|ref|XP\_002328068.1| [Populus trichocarpa]  
MEFENHSPSISLRLQNLCKPCNNPINYIYNLQKQERPVTVLKKKKAGRKKFKETRHPVYRGRVRRNNGN  
KVVCEVREPNNKSRIWLGTFPEMAARAHDAALALRGRSACLNFAWSAWRLPVPASGTAKDIQRATAEAAEEFRPAESKAVE  
AALNDPFSMVMSCPNNCSEKVSHPNALFFDEEALFNMPGLLDMAEGLILTPPVMQRGFNWDDMACS  
TDLTLWEED

>S1CBF1 gi|267799530|gb|ACY79412.1| [Solanum lycopersicoides]  
MNIFETYNSDSLILIESSSSSSSSSSSFSEEEIILASNNPKRPAGRKKFRETRHPVYRGRVRRNNGN  
VCEVREPNNKTRIWLGTFTPEMAARAHDAALALRGRSACLNFAWSAWRLPVPASSNSKDIQKAAAEAA  
EIFRPLSESEEEVSGESDNSTPETPENVEEVQESSFFVDEEALFFMPGLLANMVEGLMLPPPQCAEMG  
DHYVETDAYMITLWNYSI

>LhCBF1 gi|72068957|dbj|BAE17131.1| [Lycopersicon hirsutum]  
MNIFETYNSDSLIESSSSSSSSSSSFSEEEIILASNNPKRPAGRKKFRETRHPVYRGRVRRNNGN  
CEVREPNNKTRIWLGTFTPEMAARAHDAALALRGRSACLNFAWSAWRLPVPASSNSKDIQKAAAEAAE  
IFRPLKESEEEVSGESDNSTPETPENVEEVQESSDFVDEEALFFMPGLLANMAEGLMLPPPQCAEMGDHYVET  
DAYMITLWNYSI

>ShCBF1 gi|171191052|gb|ACB45087.1| [Solanum habrochaites]  
MNIFETYNSDSLIESSSSSSSSSSSFSEEEIILASNNPKRPAGRKKFRETRHPVYRGRVRRNNGN  
REPNNKTRIWLGTFTPEMAARAHDAALALRGRSACLNFAWSAWRLPVPASSNSKDIQKAAAEAAEIFR  
PLKESEEVSGESDNSTPETPENVEEVQESSDFVDEEALFFMPGLLANMAEGLMLPPPQCAEMGDHYVETDAY  
MITLWNYSI

>S1CBF3 gi|45826358|gb|AAS77819.1| [Solanum lycopersicum]  
MFYSDPRIESSFSFSDSIRANHSDEEVLASNNPKRPAGRKKFRETRHPVYRGRVRRNNGN  
KTRIWLGTFTPEMAARAHDAALALRGRSACLNFAWSAWRLPTDSSDTKDIQKAAQAEEIFRPLKS  
EEEEVVKDQSTTPDDMFFMDEEALFCMPGLLTNMAEGLMVPVPPQCTEMGDHVEADDMPPLWSYSI

>PtDREB70 gi|224122476|ref|XP\_002318846.1| [Populus trichocarpa]  
MDLFSHYSDPSPFGATDFWVFNENNGINQEQCSYSPVLSDSISSNVTTTRVQPAPNFSDEEVMLASRNP  
KKRAGRKKFRETRHPVYRGRVRRRNSGKWVCEVREPNNKSRIWLGTFPEMAARAHDAALALRGRSACLN  
FAWSAWRLPVPASSEAKDIQKAAAEAAAGFRPEGCVGGELMRTGDEGEKAAETTAEAGEEVFYMDDEAV  
FGMPGLLANMAEGLMLPPPHCGGGGDGWDNMENIDADMPLWSFSI

>PtCBF1 gi|134038590|gb|AB048363.1| [*Populus trichocarpa*]  
MLASRNPKKRAGRKKFRETRHPVYRGRVRRRNSGKVVCEVREPNKKSRIWLGTFPTAEMAARAHDAALAL  
RGRSACLNFAWSAWRLPVPASSEAKDIQKAAAEAGGFRPEGCVGGELMRTGDEGEKAAETTAEAGEEVF  
YMDDEAVFGMPGLLANMAEGMLLPPPHCGGGGDGWDNMENIDADMPLWSFSI

>AbCBF1 gi|156186811|gb|ABU55662.1| [*Ampelopsis glandulosa* var. *brevipedunculata*]  
TNPSSNSLLPLQCISHKRKAGRKKFRETRHPYRGRVQRNGNKVVCEVREPLKKSRIWLGTFPTPEMAA  
RANDVAALALRGHFASLNFPSAWSLPRPKSSAPEDIQVAALEATKAFNPTAPSSSSLSSASDSMSGVAG  
SKKVLETSLVDSPNLLTQRKVLEVSSVDSKRSEKVGDSMTVFMDEEALFNMPGLIDSMAEGLIL

>CaCBF2 gi|156186831|gb|ABU55671.1| [*Cissus antarctica*]  
VNPVSSDSRWSSRCIPHKRKNRKKFRETRHPYRGRVQRNANKVVSEVREPRKKSRIWLGTFPTPEMAA  
RAHDVGAALSLRGHSTSLNFPDSAWLLPRASSSSVGDILAAIQAAKAFQPPASSSSSSSIVIDNMSTGSR  
KILQTSSVVDSPHKSQKKVSEASSVDSKRLEKAGDGFPTGFVDEEAVFNMPCLIDSMAEGLLL

>CaCBF1 gi|156186816|gb|ABU55664.1| [*Cissus antarctica*]  
INPNSSDLLLLQRIGPKRKRKAGRKKFRETRHPYRGRVQRNGNKVVCEVREPFKKSRIWLGTFPTPEMAA  
RAHDVAALALRGHFASLNFPSAWRLPRPMSSSAEDIQVAALEATKAFNPTAPSSSSLSSALDNMSGVAD  
SKKVLKTPPSVSPKLRQRKFLEVPSVDTKRSEKVGDSITVFMDEEALFNMPGLIDSMAEGLLL

>PiCBF1 gi|156186807|gb|ABU55660.1| [*Parthenocissus inserta*]  
LQCI GHKRKAGRRKFRERTRHPYRGRVQRNGNKVVCEVREPLKKSRIWLGTFPTPEMAARAHDAALALALR  
GHFASLNFPSAWRLPRPKSSSAEDIQIAALEATKSFNPTAPSSSSLASALDSMSGVPGSKKVLETSPSV  
ESPKLKSQRKVLEVSSVDTKVADGSMTVFMDEEAVFNMPGLINS

|           |                                                                                   |     |
|-----------|-----------------------------------------------------------------------------------|-----|
| AtDREB1a  | ....MNSF.SAFSEMFG.....SDYESSVS.....SGGDYIPTLASS                                   | 32  |
| AtDREB1b  | ....MNSF.SAFSEMFG.....SDYEP.....QGGDYCPTLATS                                      | 29  |
| AtDREB1c  | ....MNSF.SAFSEMFG.....SDYESPVS.....SGGDYSPKLATS                                   | 32  |
| AtDREB1d  | ....MNFYSTFPDSFLS.....IDHRSPPVS.....DSSECSPKLASS                                  | 35  |
| AtDREB1E  | .....MENDITVAEM                                                                   | 11  |
| AtDREB1F  | .....MNNDIILAE                                                                    | 11  |
| EgCBF1D   | .....MAAPG.....NFPDEEVLASH                                                        | 17  |
| NtDREBF4  | ....MNIFGDHNFDPDIPTLSTSL...LPAAESSTSSD...SGSSGSTPNYSDEEVMLASN                     | 51  |
| PpDREB    | ....MDMFSQAQLSDSPDQES.....SSFSDASVTTL.....PASSDENVILASS                           | 42  |
| PtDREB69  | ....MVMGGNSFSPDKQESSLS...SLLSDSSGSQQ.....DSPSSNEKVLATS                            | 44  |
| RcDREB1A  | ...MDHHIFSQSDPPFPNSNITRDSPTLSDACSAPG.....GSSHSDDEVILASN                           | 49  |
| RhDREB1B  | MDGGFSAPQYDHTQYPPFGS.....DLPESSSHSDNNSGNVGRMNLSDDEVMLAAT                          | 54  |
| ScCBF3    | ....NDIFRSYSDPQLESSES.....FSDTTTYN.....SPNRANHSDEEVLASN                           | 43  |
| Consensus | <b>AP2 domain where the degenerate primers<sup>a</sup></b>                        |     |
| AtDREB1a  | CPKKPAGRKKFRETRHPVIRGVRRRNSCKWVCEWRBPN.KKTRVULGTFCTAEMAARAHD                      | 91  |
| AtDREB1b  | CPKKPAGRKKFRETRHPVIRGVRRRNSCKWVCEWRBPN.KKTRVULGTFCTAEMAARAHD                      | 88  |
| AtDREB1c  | CPKKPAGRKKFRETRHPVIRGVRRRNSCKWVCEWRBPN.KKTRVULGTFCTAEMAARAHD                      | 91  |
| AtDREB1d  | CPKKPAGRKKFRETRHPVIRGVRRRNSCKWVCEWRBPN.KKTRVULGTFCTAEMAARAHD                      | 94  |
| AtDREB1E  | KPKKRAGRIFKRETRHPVIRGVRRRNGDKWVCEWRBPI.HQRRVULGTYPTAEMAARAHD                      | 70  |
| AtDREB1F  | RPKKRAGRIFKRETRHPVIRGVRRRNGDKWVCEWRBPT.HQRRVULGTYPTAEMAARAHD                      | 70  |
| EgCBF1D   | HPKKRAGRKKFRETRHPVIRGVRRRNSCKWVCEWRBPN.KKTRVULGTFCTAEMAARAHD                      | 76  |
| NtDREBF4  | YPKKRAGRKKFRETRHPVIRGVRRRNSCKWVCEWRBPN.KKTRVULGTFCTAEMAARAHD                      | 110 |
| PpDREB    | RPKKRAGRIFKRETRHPVIRGVRRRNSCKWVCEWRBPN.KKTRVULGTYPTAEMAARAHD                      | 102 |
| PtDREB69  | RPKKRAGRIFKRETRHPVIRGVRRRNGDKWVCEWRBPN.KKTRVULGTYPTAEMAARAHD                      | 103 |
| RcDREB1A  | LPKKPAGRIFKRETRHPVIRGVRRRNSCKWVCEWRBPN.KKTRVULGTYPTAEMAARAHD                      | 108 |
| RhDREB1B  | YPKKRAGRKKFRETRHPVIRGVRRRNSCKWVCEWRBPN.KKTRVULGTFCTAEMAARAHD                      | 113 |
| ScCBF3    | NPKKPAGRKKFRETRHPVIRGVRRRNSCKWVCEWRBPN.KKTRVULGTFCTAEMAARAHD                      | 102 |
| Consensus | <b>pkk agr f etrhp rg r r kvv e r p r w lgt t maarahd</b><br><b>were designed</b> |     |
| AtDREB1a  | VAALALRGRSACLNFDASAURLRIPESCTAKDIQKAAAEAAALAFQDEMCDATTD...HGF                     | 148 |
| AtDREB1b  | VAALALRGRSACLNFDASAURLRIPESCTAKDIQKAAAEAAALAFQDETCDDTTTN...HGL                    | 146 |
| AtDREB1c  | VAALALRGRSACLNFDASAURLRIPESCTAKDIQKAAAEAAALAFQDEMCHMTTDA...HGL                    | 149 |
| AtDREB1d  | VAALALRGRSACLNFDASAURLRIPETTCPKREIQKAAAEAAALAFQNETTTTEGSK...TAA                   | 151 |
| AtDREB1E  | VAALALRGRSACLNFDASAURLRIPASVDPDPTTRTAAEAAEMFRPEFSTGIT...VL                        | 126 |
| AtDREB1F  | VAALALRGRSACLNFDASAURLRIPASVNDPVTTRVAAEAAEMFRPEVLESGIT...VL                       | 126 |
| EgCBF1D   | VAALALRGRSACLNFDASAURLRIPASADTKDIQKAAAEAAALAFQVESESED...VM                        | 131 |
| NtDREBF4  | VAALALRGRSACLNFDASAURLRIPASAAKDIQKAAAEAAALAFQTRPVESHRENFKE.IIV                    | 169 |
| PpDREB    | VAALALRGRSACLNFDASAURLRIPASMDTMDTRAAAEAAEMFRPEAFGLSSG...SS                        | 159 |
| PtDREB69  | VAALALRGRSACLNFDASAURLRIPASINEAKDIQKAAAEAAALAFRTSDLGGQVMEFRR                      | 163 |
| RcDREB1A  | VAALALRGRSACLNFDASAURLRIPASSTAREIRRIAAEAAEMFRPQEFGPCGEQ...NS                      | 165 |
| RhDREB1B  | VAALALRGRSACLNFDASAURLRIPASAKDIQKAAAEAAALAFRPTGESE...VV                           | 167 |
| ScCBF3    | VAALALRGRSACLNFDASAURLRIPASSDTKDIQKAAAEAAALAFRPLKSEEE...154                       |     |
| Consensus | <b>va rg ac nf dsaur l p i aa f</b>                                               |     |
| AtDREB1a  | DMEETLVEA..IYTAE....QSENAFYMHDE....AMFEMPSLLANMAEGHLLPLPSV                        | 196 |
| AtDREB1b  | DMEETHVEA..IYTPE....QSEGAFYMHDE....TMFGMPTLLDNMAEGHLLPPPSV                        | 194 |
| AtDREB1c  | DMEETLVEA..IYTPE....QSQDAFYMHDE....AMLGMSLLDNMAEGHLLPPSPV                         | 197 |
| AtDREB1d  | EAEAAAGEG..VREGERRAEQNGGVFYMHDE....ALLGMPNFFENMAEGHLLPPPEV                        | 204 |
| AtDREB1E  | PSA.....SEFDTSD.....EGVAGMMRLAEEPLMSPPRS                                          | 157 |
| AtDREB1F  | PCAGDDVDLGFSGSG....SGSGSEERNSSSYFGDYEEVSTIMMRLAEGPLMSPPRS                         | 181 |
| EgCBF1D   | SGDEKKSPPS..EEG.....MLFDDE....DVFGMFGLLTNMAEGHLLPPRC                              | 172 |
| NtDREBF4  | DQVIQELVA..ELPDN.....VLFMDEE....ALFCMPRLIDNMAEGHLLPPPC                            | 213 |
| PpDREB    | DEKEMNLV..DMEKN....SSLCLFYLDEE....EMFDMPLIDNMAEGHLLSPPQC                          | 207 |
| PtDREB69  | DRGEVCSSTNDDIRDL....PSENVGYIDEE....AEFNMFGLLASMAEGHLLSPPHY                        | 213 |
| RcDREB1A  | STEDHPSGACCKDESKT.....TVPFMDAE....EVFDMPSLLVMAEGHLLSPLRF                          | 212 |
| RhDREB1B  | SGSVTATEA..ELEP.....VFCMDEE....DVFGMFGLLTNMAEGHLLSPPHY                            | 210 |
| ScCBF3    | SVVTTGDQT..STPDD.....MFFMDEE....ALFCMPGLLTNMAEGHLLMVFPPQC                         | 198 |
| Consensus | <b>a</b>                                                                          |     |
| AtDREB1a  | Q.....WNHNHEVDGDDVSLWSY.                                                          | 216 |
| AtDREB1b  | Q.....WNHNYDCEGDVSLWSY.                                                           | 213 |
| AtDREB1c  | Q.....WNYNFDVEGDDVSLWSY.                                                          | 216 |
| AtDREB1d  | G.....WNHN.DFDGVDVSLWSFD                                                          | 223 |
| AtDREB1E  | YID.MN.TSVYVDEEMCYELSLWSY.                                                        | 181 |
| AtDREB1F  | YMEDMTPINNVYTEEMCYELMSLWSYR                                                       | 208 |
| EgCBF1D   | GGD...GYGDEDDGNLD.AYVSLWSYS                                                       | 195 |
| NtDREBF4  | I.....IDG.YEMEADHADMSLWSY.                                                        | 232 |
| PpDREB    | SAG...YLNWDDVETE.ADAKLSWSFS                                                       | 229 |
| PtDREB69  | TG.....DWNDCGID.ADWLSWS.                                                          | 231 |
| RcDREB1A  | EED...VGTDWNGLEND.FDISLWS.                                                        | 234 |
| RhDREB1B  | N....SYGG.DDMEGY.ADVLSWSYS                                                        | 230 |
| ScCBF3    | T.....EMG.DHVEAD..DMPLWSYS                                                        | 216 |
| Consensus | <b>lws</b>                                                                        |     |

Figure S1. The conserved AP2 domain of some dicotyledon DREB genes.
